# Supplementary material for: Cell Adhesion Molecule 1 Contributes to Cell Survival in Crowded Epithelial Monolayers
Source: MDPI journal article supplement (doi:10.3390/ijms21114123), 2020-06-09
Supplement: s1 [file s1]

# Supplementary materials: Cell Adhesion Molecule 1 Contributes to Cell Survival in Crowded Epithelial Monolayers

Man Hagiya, Ryuichiro Kimura, Azusa Yoneshige, Takao Inoue, Tomoyuki Otani and Akihiko Ito

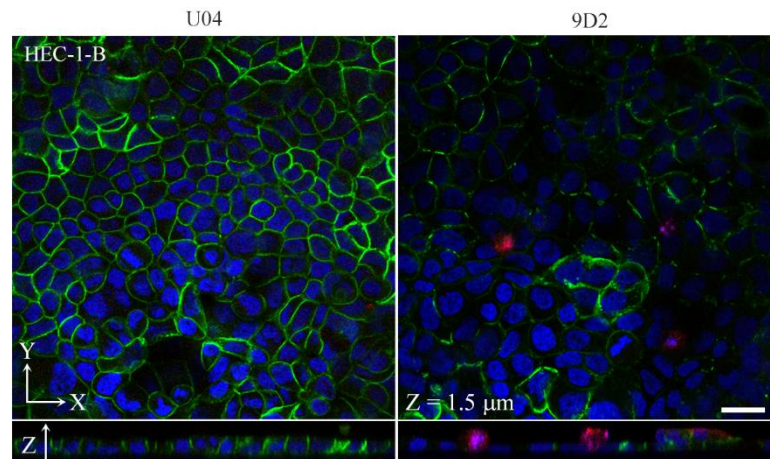

**Figure S1.** 9D2 induces apoptosis in crowded HEC-1-B cells and decreases the cell height. HEC-1-B cells were cultured on a semipermeable membrane in 12-well plates. When the cells reached 100% confluence, control IgY U04 or 9D2 was added at a concentration of 10  $\mu\text{g/ml}$ . After 2 days, the cells were triple-stained with CADM1 immunofluorescence (3E1 antibody; green), TUNEL method (red), and DAPI nuclear staining (blue). HEC-1-B cells treated with 9D2 were micrographed in an X-Y plane at the Z axis of about 1.5  $\mu\text{m}$ . Note that the number of TUNEL-positive cells are smaller than that in Figure 5, which X-Y plane is at the Z axis of about 3.5  $\mu\text{m}$ . Scale bar = 20  $\mu\text{m}$ .

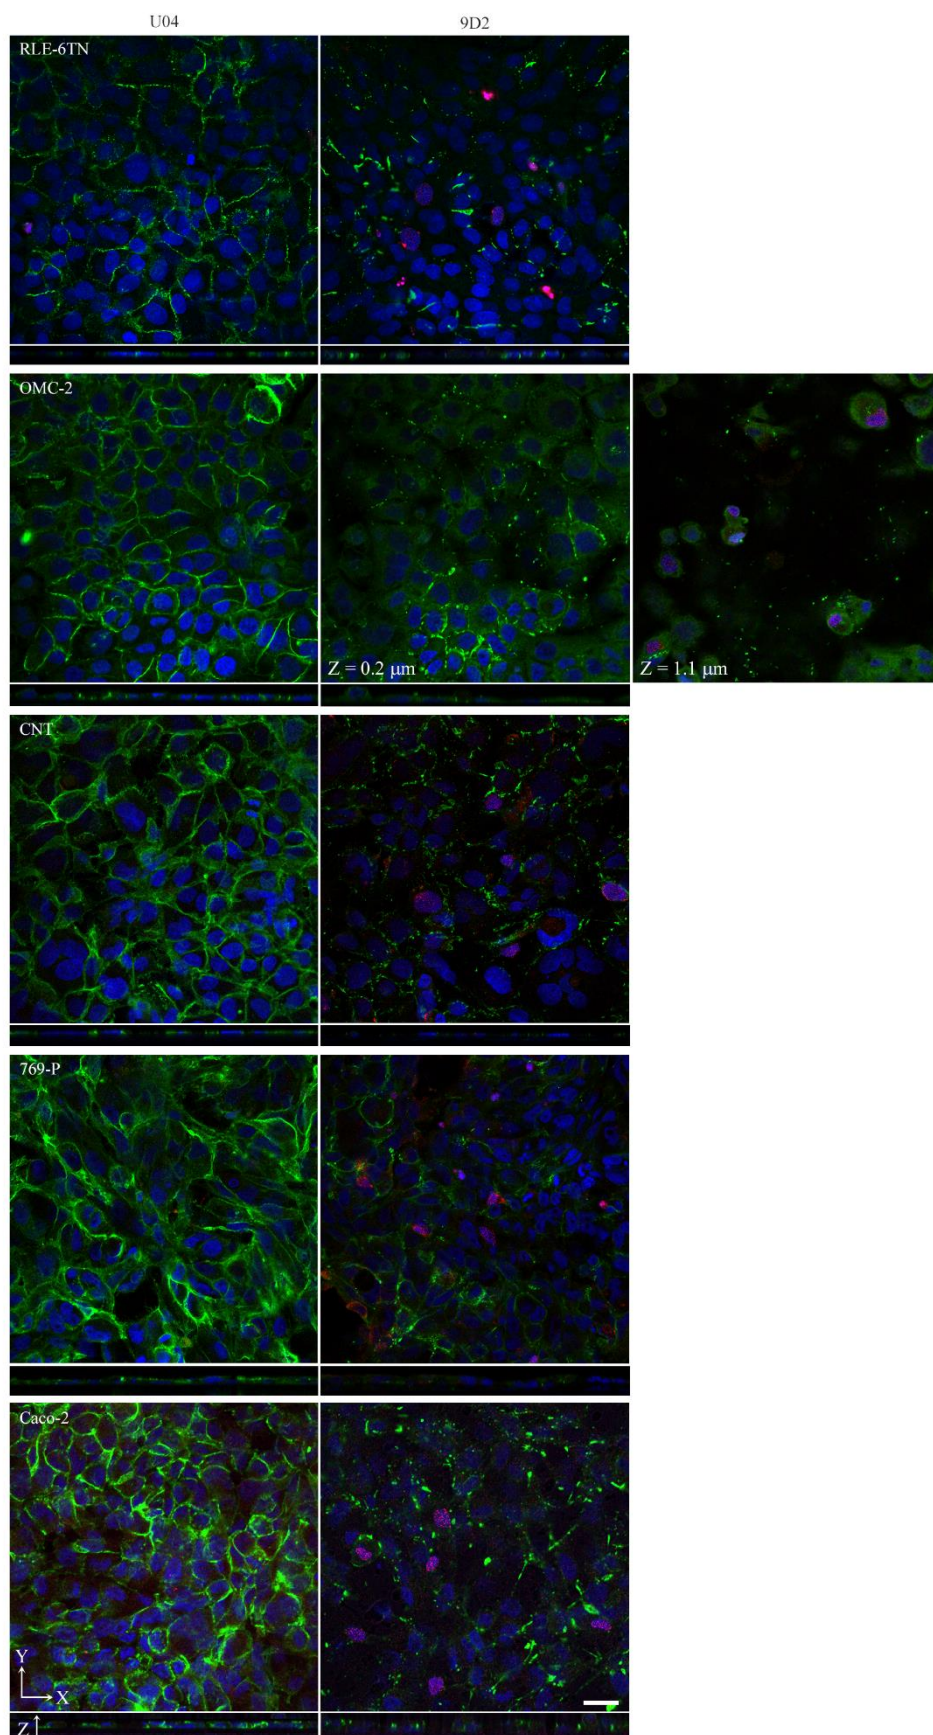

**Figure S2.** 9D2 induces apoptosis in crowded epithelial cell monolayers. Various cell lines indicated were cultured on a semipermeable membrane in 12-well plates. When the cells reached 100% confluence, control IgY U04 or 9D2 was added at a concentration of 10  $\mu\text{g/ml}$ . After 2 days, the cells

were triple-stained with CADM1 immunofluorescence (3E1 antibody; green), TUNEL method (red), and DAPI nuclear staining (blue). OMC-2 cells treated with 9D2 were micrographed in two X-Y planes at the Z axis of 0.2 and 1.1  $\mu\text{m}$ . Note that the number of TUNEL-positive cells are larger in the X-Y plane at Z = 1.1  $\mu\text{m}$ . Scale bar = 20  $\mu\text{m}$ .

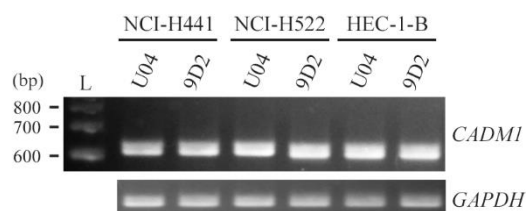

**Figure S3.** Reverse transcription-PCR analyses for the *CADM1* mRNA. Three cell lines indicated were cultured on a semipermeable membrane in 12-well plates. When the cells reached 100% confluence, control IgY U04 or 9D2 was added at a concentration of 10  $\mu\text{g}/\text{ml}$ . After 2 days, total RNA was extracted from the cells, reverse transcribed, and was PCR-amplified using a primer set for *CADM1* or glyceraldehyde 3-phosphate dehydrogenase (GAPDH). The PCR products were electrophoresed on agarose gels. L, ladder size marker.

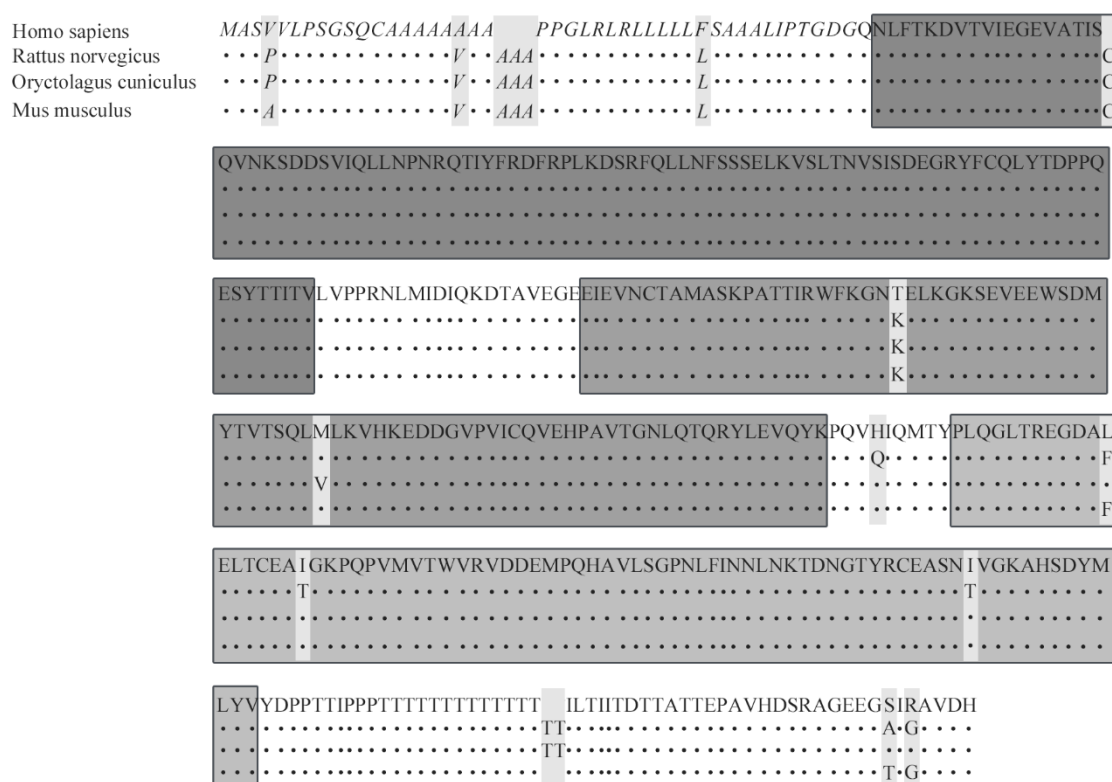

**Figure S4.** Alignment of the amino acid sequence of the CADM1 ectodomain among humans, rats, rabbits, and mice. The predicted signal peptide is shown in italic. Three Ig-like loops are boxed. Dots indicate amino acids identical to those of the human CADM1. Spaces without letters mean that there are no corresponding amino acid residues in the human CADM1 ectodomain. The positions of residues that are not completely conserved are highlighted by the faint gray background. The GenBank accession numbers are NP\_001287973 (Homo sapiens), XP\_006243006 (Rattus norvegicus), XP\_002708452 (Oryctolagus cuniculus), and NP\_997558 (Mus musculus).

**Table S1.** Cell lines used in the study.

| Name     | Origin and definition                               | Doubling time |                          |
|----------|-----------------------------------------------------|---------------|--------------------------|
|          |                                                     | (hour)        | Reference                |
| NCI-H441 | Human lung papillary adenocarcinoma                 | 58            | ATCC <sup>1</sup>        |
| NCI-H522 | Human lung adenocarcinoma, stage 2                  | 38            | Cellosaurus <sup>2</sup> |
| RLE-6TN  | Rat alveolar type II; SV40-transfected, transformed |               |                          |
| HEC-1B   | Human endometrial adenocarcinoma G2                 | 46            | JCRB <sup>3</sup>        |
| OMC-2    | Human endometrial adenocarcinoma                    | 55-139        | Cellosaurus              |
| CNT      | Rabbit kidney distal tube; SV40-transfected         |               |                          |
| 769-P    | Human kidney clear cell carcinoma                   | 35            | ATCC                     |
| Caco-2   | Human colon adenocarcinoma                          | 62            | ATCC                     |

<sup>1</sup> American Type Culture Collection. <https://www.atcc.org/>; <sup>2</sup> A knowledge resource on cell lines. <https://web.expasy.org/cellosaurus/>; <sup>3</sup> Japanese Collection of Research Bioresources. <https://cellbank.nibiohn.go.jp/english/>.

**Table S2.** *P*-values by one-way ANOVA and Bonferroni correction.

| Cell     | ANOVA   | Bonferroni |         |         |         |        |
|----------|---------|------------|---------|---------|---------|--------|
|          |         | Confluence | 30      | 50      | 70      | 90     |
| NCI-H441 | < 0.001 | 50         | 0.0088  | –       | –       | –      |
|          |         | 70         | < 0.001 | 0.138   | –       | –      |
|          |         | 90         | < 0.001 | < 0.001 | < 0.001 | –      |
|          |         | 110        | < 0.001 | < 0.001 | < 0.001 | 1      |
| RLE-6TN  | < 0.001 | 70         |         | 0.157   | –       | –      |
|          |         | 90         |         | < 0.001 | 0.0069  | –      |
|          |         | 110        |         | < 0.001 | < 0.001 | 0.0404 |

Figure 1B: CADM1 expression level.

| Cell     | ANOVA   | Bonferroni |         |        |
|----------|---------|------------|---------|--------|
|          |         | Confluence | 50      | 70     |
| NCI-H441 | < 0.001 | 70         | 0.682   | –      |
|          |         | 110        | < 0.001 | 0.0025 |

Figure 1C: Cell height.

| Cell     | ANOVA   | Bonferroni |         |          |
|----------|---------|------------|---------|----------|
|          |         | RNA        | None    | scramble |
| NCI-H441 | < 0.001 | scramble   | 0.360   | –        |
|          |         | si-CADM1   | < 0.001 | < 0.001  |
| RLE-6TN  | < 0.001 | scramble   | 0.160   | –        |
|          |         | si-CADM1   | < 0.001 | < 0.001  |

Figure 3B: CADM1 expression level.

| Cell     | ANOVA   | Bonferroni |        |         |
|----------|---------|------------|--------|---------|
|          |         | IgY        | U04    | 9D2     |
| NCI-H441 | < 0.001 | None       | 1      | < 0.001 |
|          |         | U04        | –      | < 0.001 |
| NCI-H522 | < 0.001 | None       | 0.960  | < 0.001 |
|          |         | U04        | –      | < 0.001 |
| RLE-6TN  | 0.0013  | None       | 1      | 0.0041  |
|          |         | U04        | –      | 0.0019  |
| HEC-1-B  | < 0.001 | None       | 1      | < 0.001 |
|          |         | U04        | –      | < 0.001 |
| OMC-2    | 0.0025  | None       | 1      | 0.0064  |
|          |         | U04        | –      | 0.0042  |
| CNT      | < 0.001 | None       | 1      | < 0.001 |
|          |         | U04        | –      | < 0.001 |
| 769-P    | < 0.001 | None       | 0.0078 | < 0.001 |
|          |         | U04        | –      | < 0.001 |
| Caco-2   | 0.0059  | None       | 1      | 0.0156  |
|          |         | U04        | –      | 0.0097  |

Figure 4B: CADM1 expression level.
